# Supplementary material for: Pathophysiologic Signature of Impending ICU Hypoglycemia in Bedside Monitoring and Electronic Health Record Data: Model Development and External Validation
Source: PubMed Central journal article supplement — Crit Care Med. 2021 Jun 24;50(3):e221–30. doi: 10.1097/CCM.0000000000005171 (PMC8855943; doi:10.1097/ccm.0000000000005171), 2021-06-24
Supplement: ccm-50-e221-s001.pdf [file ccm-50-e221-s001.pdf]

**Supplemental Figure.** Cross-validated area under the receiver operating characteristic curve (AUROC) values by event detection window. At -10 hours, for example, a positive prediction within -10 to 0 hours before event is considered a true positive. *ICU* (▲) represents the aggregate ICU hypoglycemia model; *Glucose* (●) represents the model with serum glucose alone (i.e., all other laboratory, hemodynamic, and electrophysiological variables removed); and *ICU-glucose* (■) represents the ICU hypoglycemia model without serum glucose. The aggregate ICU hypoglycemia model demonstrated significantly higher AUROC than the other models at every detection window tested (Wilcoxon rank sum test,  $\alpha=0.05$ . (AUC= area under the receiver operating characteristic curve).

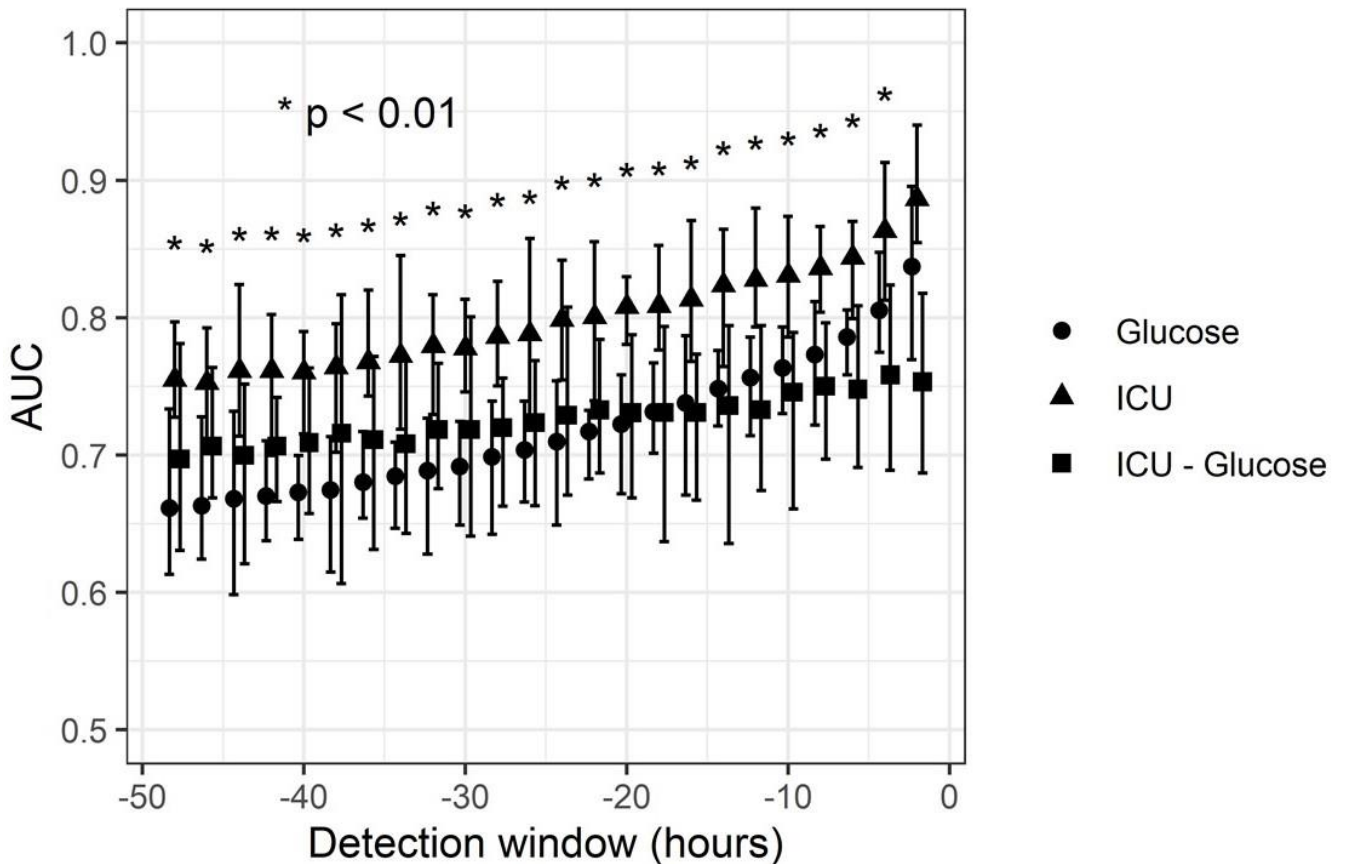

TRIPOD Checklist: Prediction Model Development and Validation

| Section/Topic                | Item | Checklist Item | Page                                                                                                                                                                                                  |                       |
|------------------------------|------|----------------|-------------------------------------------------------------------------------------------------------------------------------------------------------------------------------------------------------|-----------------------|
| <b>Title and abstract</b>    |      |                |                                                                                                                                                                                                       |                       |
| Title                        | 1    | D;V            | Identify the study as developing and/or validating a multivariable prediction model, the target population, and the outcome to be predicted.                                                          | 1                     |
| Abstract                     | 2    | D;V            | Provide a summary of objectives, study design, setting, participants, sample size, predictors, outcome, statistical analysis, results, and conclusions.                                               | 2                     |
| <b>Introduction</b>          |      |                |                                                                                                                                                                                                       |                       |
| Background and objectives    | 3a   | D;V            | Explain the medical context (including whether diagnostic or prognostic) and rationale for developing or validating the multivariable prediction model, including references to existing models.      | 4, 12, & 13           |
|                              | 3b   | D;V            | Specify the objectives, including whether the study describes the development or validation of the model or both.                                                                                     | 4                     |
| <b>Methods</b>               |      |                |                                                                                                                                                                                                       |                       |
| Source of data               | 4a   | D;V            | Describe the study design or source of data (e.g., randomized trial, cohort, or registry data), separately for the development and validation data sets, if applicable.                               | 4 & 5                 |
|                              | 4b   | D;V            | Specify the key study dates, including start of accrual; end of accrual; and, if applicable, end of follow-up.                                                                                        | 4 & 5                 |
| Participants                 | 5a   | D;V            | Specify key elements of the study setting (e.g., primary care, secondary care, general population) including number and location of centres.                                                          | 4                     |
|                              | 5b   | D;V            | Describe eligibility criteria for participants.                                                                                                                                                       | 4                     |
|                              | 5c   | D;V            | Give details of treatments received, if relevant.                                                                                                                                                     | 4 & 5                 |
| Outcome                      | 6a   | D;V            | Clearly define the outcome that is predicted by the prediction model, including how and when assessed.                                                                                                | 5                     |
|                              | 6b   | D;V            | Report any actions to blind assessment of the outcome to be predicted.                                                                                                                                | 5                     |
| Predictors                   | 7a   | D;V            | Clearly define all predictors used in developing or validating the multivariable prediction model, including how and when they were measured.                                                         | 5-6                   |
|                              | 7b   | D;V            | Report any actions to blind assessment of predictors for the outcome and other predictors.                                                                                                            | 5-6                   |
| Sample size                  | 8    | D;V            | Explain how the study size was arrived at.                                                                                                                                                            | 4                     |
| Missing data                 | 9    | D;V            | Describe how missing data were handled (e.g., complete-case analysis, single imputation, multiple imputation) with details of any imputation method.                                                  | 6                     |
| Statistical analysis methods | 10a  | D              | Describe how predictors were handled in the analyses.                                                                                                                                                 | 6 & 7                 |
|                              | 10b  | D              | Specify type of model, all model-building procedures (including any predictor selection), and method for internal validation.                                                                         | 5-7                   |
|                              | 10c  | V              | For validation, describe how the predictions were calculated.                                                                                                                                         | 7                     |
|                              | 10d  | D;V            | Specify all measures used to assess model performance and, if relevant, to compare multiple models.                                                                                                   | 7                     |
|                              | 10e  | V              | Describe any model updating (e.g., recalibration) arising from the validation, if done.                                                                                                               | 7                     |
| Risk groups                  | 11   | D;V            | Provide details on how risk groups were created, if done.                                                                                                                                             | N/A                   |
| Development vs. validation   | 12   | V              | For validation, identify any differences from the development data in setting, eligibility criteria, outcome, and predictors.                                                                         | 7                     |
| <b>Results</b>               |      |                |                                                                                                                                                                                                       |                       |
| Participants                 | 13a  | D;V            | Describe the flow of participants through the study, including the number of participants with and without the outcome and, if applicable, a summary of the follow-up time. A diagram may be helpful. | 7                     |
|                              | 13b  | D;V            | Describe the characteristics of the participants (basic demographics, clinical features, available predictors), including the number of participants with missing data for predictors and outcome.    | 7 & 16                |
|                              | 13c  | V              | For validation, show a comparison with the development data of the distribution of important variables (demographics, predictors and outcome).                                                        | 7 & 16                |
| Model development            | 14a  | D              | Specify the number of participants and outcome events in each analysis.                                                                                                                               | 7 & 19                |
|                              | 14b  | D              | If done, report the unadjusted association between each candidate predictor and outcome.                                                                                                              | 8, 9, 20, & 21        |
| Model specification          | 15a  | D              | Present the full prediction model to allow predictions for individuals (i.e., all regression coefficients, and model intercept or baseline survival at a given time point).                           | 8-11                  |
|                              | 15b  | D              | Explain how to use the prediction model.                                                                                                                                                              | 11 & 12               |
| Model performance            | 16   | D;V            | Report performance measures (with CIs) for the prediction model.                                                                                                                                      | 10                    |
| Model-updating               | 17   | V              | If done, report the results from any model updating (i.e., model specification, model performance).                                                                                                   | 10 & 11               |
| <b>Discussion</b>            |      |                |                                                                                                                                                                                                       |                       |
| Limitations                  | 18   | D;V            | Discuss any limitations of the study (such as nonrepresentative sample, few events per predictor, missing data).                                                                                      | 13                    |
| Interpretation               | 19a  | V              | For validation, discuss the results with reference to performance in the development data, and any other validation data.                                                                             | 9                     |
|                              | 19b  | D;V            | Give an overall interpretation of the results, considering objectives, limitations, results from similar studies, and other relevant evidence.                                                        | 9-12                  |
| Implications                 | 20   | D;V            | Discuss the potential clinical use of the model and implications for future research.                                                                                                                 | 12-14                 |
| <b>Other information</b>     |      |                |                                                                                                                                                                                                       |                       |
| Supplementary information    | 21   | D;V            | Provide information about the availability of supplementary resources, such as study protocol, Web calculator, and data sets.                                                                         | Supplemental Material |
| Funding                      | 22   | D;V            | Give the source of funding and the role of the funders for the present study.                                                                                                                         | 15                    |
